CORRECTION

# Correction: Reactivation of Latent Tuberculosis in Cynomolgus Macaques Infected with SIV Is Associated with Early Peripheral T Cell Depletion and Not Virus Load

The *PLOS ONE* Staff

The authors incorrectly report that  $10^6$ – $10^7$  TCID<sub>50</sub> units of SIV<sub>mac251</sub> were intravenously injected into the macaques. The amount of virus actually injected was approximately  $1.67 \times 10^5$  RNA copies. This does not affect the data or conclusions.

## Reference

1. Diedrich CR, Mattila JT, Klein E, Janssen C, Phuah J, Sturgeon TJ, et al. (2010) Reactivation of Latent Tuberculosis in Cynomolgus Macaques Infected with SIV Is Associated with Early Peripheral T Cell Depletion and Not Virus Load. PLoS ONE 5(3): e9611. doi: [10.1371/journal.pone.0009611](https://doi.org/10.1371/journal.pone.0009611) PMID: [20224771](https://pubmed.ncbi.nlm.nih.gov/20224771/)

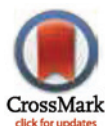

## OPEN ACCESS

**Citation:** The *PLOS ONE* Staff (2015) Correction: Reactivation of Latent Tuberculosis in Cynomolgus Macaques Infected with SIV Is Associated with Early Peripheral T Cell Depletion and Not Virus Load. PLoS ONE 10(4): e0124221. doi:10.1371/journal.pone.0124221

**Published:** April 13, 2015

**Copyright:** © 2015 The PLOS ONE Staff. This is an open access article distributed under the terms of the [Creative Commons Attribution License](https://creativecommons.org/licenses/by/4.0/), which permits unrestricted use, distribution, and reproduction in any medium, provided the original author and source are credited.
